# Supplementary material
Source: PubMed Central journal article supplement (PMC10206345)
Supplement: 11655_2023_3549_MOESM1_ESM.pdf [file 11655_2023_3549_MOESM1_ESM.pdf]

**Appendix 1 Cumulative Negative Conversion Rates of Infected Patients [Rate, cases(%)]**

| Time  | Control group (496 cases) | Treatment group (496 cases) |
|-------|---------------------------|-----------------------------|
| Day 2 | 14(2.82)                  | 142(28.63)                  |
| Day 3 | 95(19.15)                 | 265(53.43)                  |
| Day 4 | 175(35.28)                | 319(64.31)                  |
| Day 5 | 286(57.66)                | 376(75.81)                  |
| Day 6 | 391(78.83)                | 428(86.29)                  |
| Day7  | 431(86.90)                | 455(91.73)*                 |

Note: \* $P < 0.05$ , vs control group

**Appendix 2 Cumulative Negative Conversion Rates in Vaccinated and Unvaccinated Subgroups [Rate, cases (%)]**

| Times   | Unvaccinated group (224 cases) |                             | Vaccinated group (768 cases) |                             |
|---------|--------------------------------|-----------------------------|------------------------------|-----------------------------|
|         | Control group (106 cases)      | Treatment group (118 cases) | Control group (390 cases)    | Treatment group (378 cases) |
| At Day2 | 5(4.72)                        | 31(26.27)                   | 9(2.31)                      | 111(29.37)                  |
| At Day3 | 20(18.87)                      | 58(49.15)                   | 75(19.23)                    | 207(54.76)                  |
| At Day4 | 39(36.79)                      | 71(60.17)                   | 136(34.87)                   | 248(65.61)                  |
| At Day5 | 57(53.77)                      | 85(72.03)                   | 229(58.72)                   | 291(76.98)                  |
| At Day6 | 78(73.58)                      | 100(84.75)                  | 313(80.26)                   | 328(86.77)                  |
| At Day7 | 87(82.08)                      | 107(90.68)                  | 344(88.21)                   | 348(92.06)                  |
